# Supplementary material
Source: PubMed Central journal article supplement (PMC2721551)
Supplement: msn200_3.pdf [file msn200_3.pdf]

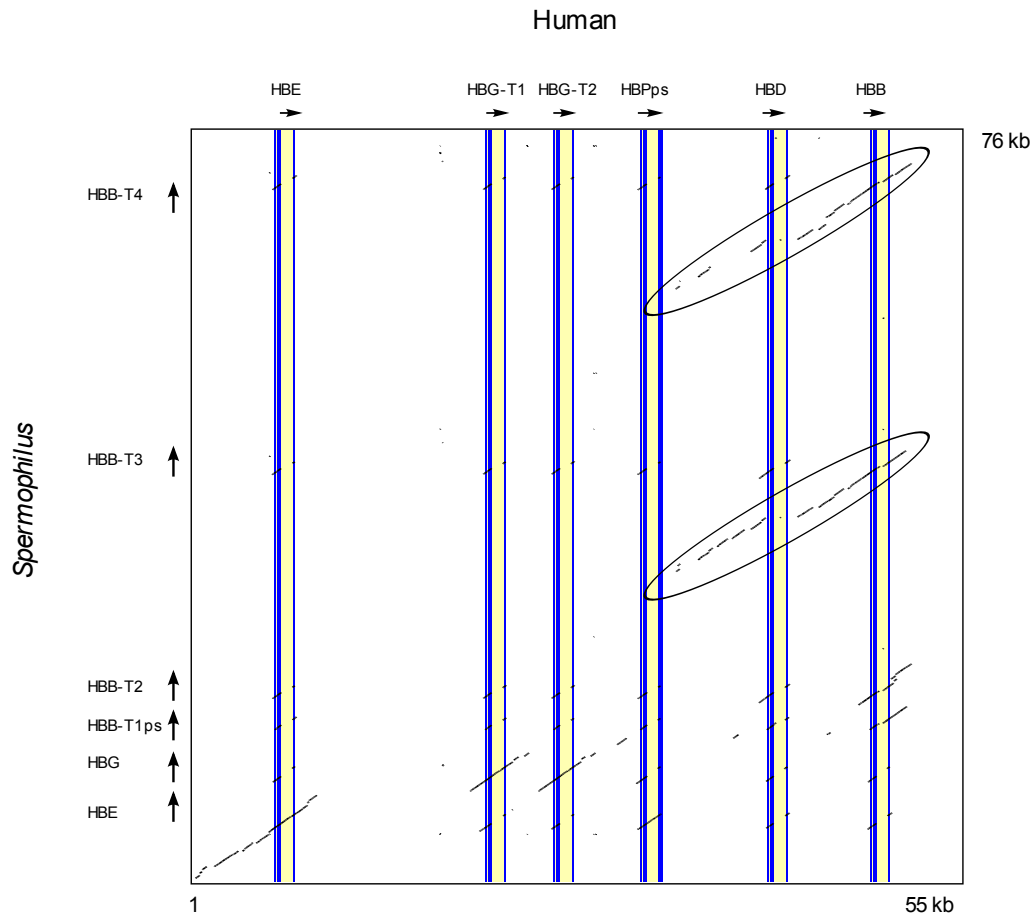

Fig. S2: Dot plot of pairwise sequence similarity between the  $\beta$ -globin gene clusters of the thirteen-lined ground squirrel (*Spermophilus tridecemlineatus*, vertical axis) and human (horizontal axis). The comparison was based on a chromosomal segment that started 5 kb upstream of the 5' HBE gene and ended 5 kb downstream of the furthest 3' HBB gene. The ellipses delineate a ~10 kb block containing a single-copy HBB gene that was tandemly duplicated in the *Spermophilus* lineage.
